# Supplementary material
Source: publisher site journal article supplement (https://www.dovepress.com/article/248911)
Supplement: Supplementary file 1 [file get_supplementary_file.php]

| Body weight (g) on day of injecting STZ | Glucose Conc. (mg/dl) on the  day of injecting STZ | Body weight (g)  3 days after injecting STZ | Glucose Conc. (mg/dl) 3 days after injecting STZ | Body weight (g) 6 days after injecting STZ | Glucose Conc. (mg/dl) 6 days after injecting STZ | Body weight (g)  9 days after injecting STZ | Glucose Conc. (mg/dl)  9 days after injecting STZ | Body weight (g)  12 days after injecting STZ | Glucose Conc. (mg/dl)  12 days after injecting STZ |
| --- | --- | --- | --- | --- | --- | --- | --- | --- | --- |
| 260 | 113 | 246 | 398 | 200 | 472 | 182 | 460 | 185 | 491 |
| 248 | 133 | 230 | 315 | 204 | 478 | 187 | 473 | 190 | 494 |
| 296 | 125 | 281 | 330 | 267 | 313 | 251 | 340 | 240 | 380 |
| 294 | 111 | 275 | 327 | 262 | 334 | 247 | 370 | 230 | 410 |
| 264 | 112 | 238 | 300 | 232 | 340 | 235 | 328 | 210 | 348 |
| 255 | 109 | 248 | 320 | 242 | 326 | 240 | 340 | 224 | 375 |
| 277 | 128 | 240 | 344 | 222 | 330 | 230 | 310 | 227 | 330 |
| 264 | 112 | 236 | 309 | 232 | 312 | 235 | 232 | 230 | 300 |
| 290 | 113 | 250 | 302 | 214 | 400 | 200 | 391 | 198 | 394 |

**Data for the rats’ body weight and glucose level after 72 hours of diabetes induction**
